# Supplementary material for: Iron near absorption edge X-ray spectroscopy at aqueous-membrane interfaces
Source: Royal Society of Chemistry journal article supplement (doi:10.1039/c4cp00657g), 2014-01-01
Supplement: c4cp00657g1.pdf [file c4cp00657g1.pdf]

# Supporting Information for: Iron near edge X-ray spectroscopy at aqueous-membrane interfaces

Wenjie Wang,<sup>a</sup> Ivan Kuzmenko,<sup>b</sup> and David Vaknin<sup>\*a</sup>

## 1 Reflectivity Data Analysis

The  $R/R_F$  data were analyzed in terms of the effective-density model, which is capable of taking into account the large and uncorrelated interfacial roughness.<sup>1</sup> The electron density (ED) profile across the interfaces along the surface normal,  $\rho(z)$ , is constructed as follows:

$$\rho(z) = \left( \sum_{j=1}^{N+1} \rho_j w_j(z) \right) / \left( \sum_{j=1}^{N+1} w_j(z) \right) \quad (\text{S1})$$

where, the weighting function  $w_j(z)$  is defined as follows.<sup>1</sup>

$$w_j(z) = \begin{cases} \frac{1}{2} \left\{ 1 + \operatorname{erf} \left[ (z - z_j) / \sqrt{2} \sigma_j \right] \right\} & z \leq \zeta_j, \\ \frac{1}{2} \left\{ 1 - \operatorname{erf} \left[ (z - z_{j-1}) / \sqrt{2} \sigma_{j-1} \right] \right\} & z > \zeta_j, \end{cases} \quad (\text{S2})$$

The coordinate  $\zeta_j = (\sigma_j z_{j-1} + \sigma_{j-1} z_j) / (\sigma_j + \sigma_{j-1})$ .  $\sigma_j, j = 1, 1, 2, \dots, N, N+1$ , represents the roughness between  $(j-1)$ -th and  $j$ -th layers. The continuous ED profile obtained using Eqn. (S1) is sliced into a stack of  $M$  slabs of constant thickness ( $\approx 1 \text{ \AA}$ ) and uniform ED (determined by Eqn. (S1) evaluated at the midpoint of each slab). The reflectivity is then evaluated by the Parratt formalism<sup>2,3</sup> with  $M \sim 100$ .

The construction of the ED profile via the effective-density model is shown in Fig. S1 for the case of  $N = 2$ , i.e. the surface monolayer is parsed into two layers (head group and tail group of known EDs). From left to right in Fig. S1 (a), the electron density changes gradually from that of an aqueous subphase, a monolayer (consisting of a headgroup and a tail group), and to air. The transition between media of different ED is approximated with an error function (erf). The thickness of the transition regime is measured by the roughness  $\sigma_j$  between medium  $j$  and  $j+1$ , as shown in Fig. S1(b).

In practice, the effective-density model is mostly applied to the thin films consisting of single-layer or multi-layer in which the ED of  $j$ -th layer ( $\rho_j$ ) is known while thickness ( $d_j$ ,  $d_j = |z_j - z_{j-1}|$ ) and interfacial roughness  $\sigma_j$  is to be determined from the reflectivity data.<sup>1</sup> If the interfacial roughness is small compared to the layer thickness, the effective-density

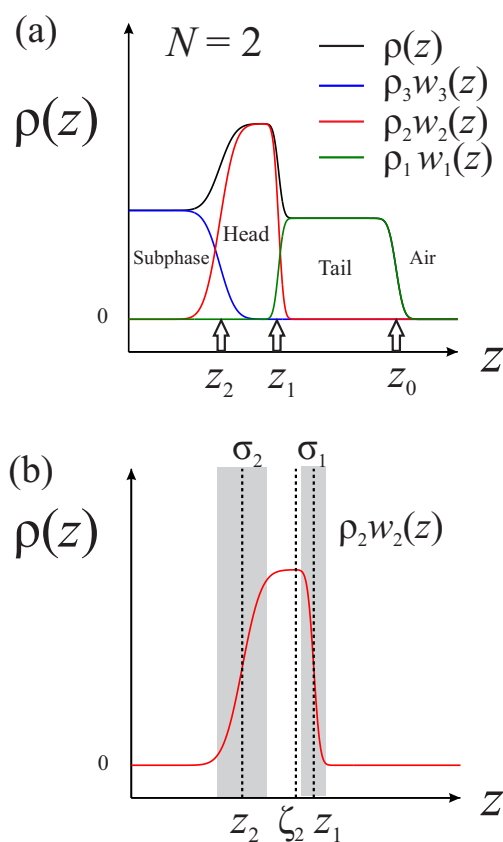

**Fig. S1** Example of the construction of the ED profile in terms of the effective-density model for  $N = 2$ .<sup>1</sup> In (a), the black line represents the *effective* electron density profile along the surface normal. The blue line ( $\rho_3 \cdot w_3(z)$ ) represents the subphase ED. The red line ( $\rho_2 \cdot w_2(z)$ ) and green line ( $\rho_1 \cdot w_1(z)$ ) represent a monolayer that is parsed into head and tail with known ED and thickness. In (b), the head group constituent ( $\rho_2 \cdot w_2(z)$ ) in (a) is singled out. The head group moiety is confined between two interfaces (gray bands) approximated with two error functions, each of which has a width measured as  $\sigma_2$  and  $\sigma_1$ . The position  $z_1$  and  $z_2$  (dashed vertical lines) correspond to the reflection points (slope maxima) in the error functions. They are used to define the interface positions when the two interfaces are well-separated, i.e.  $|z_2 - z_1| \gg (\sigma_1 + \sigma_2)$ .

<sup>a</sup> Ames Laboratory and Department of Physics and Astronomy, Iowa State University, Ames, Iowa 50011, USA. ; E-mail: vaknin@ameslab.gov

<sup>b</sup>X-ray Science Division, Advanced Photon Source, Argonne National Laboratory, Argonne, Illinois 60439, USA.

| Sample                       | AA/FeCl <sub>3</sub> | AA/FeCl <sub>2</sub> | DHDP/FeCl <sub>3</sub> | DHDP/FeCl <sub>2</sub> |
|------------------------------|----------------------|----------------------|------------------------|------------------------|
| $z_1 - z_2$ (Å)              | $0.4 \pm 1.2$        | $3.7 \pm 1.5$        | $5.7 \pm 1.7$          | $4.0 \pm 0.6$          |
| $\rho_2$ (e/Å <sup>3</sup> ) | $0.73 \pm 0.05$      | $0.54 \pm 0.04$      | $0.52 \pm 0.04$        | $0.58 \pm 0.04$        |
| $\sigma_2$ (Å)               | $7.7 \pm 0.3$        | $3.6 \pm 0.8$        | $4.0 \pm 0.7$          | $4.1 \pm 0.3$          |
| $z_0 - z_1$ (Å)              | $21.1 \pm 0.2$       | $23.0 \pm 0.5$       | $17.4 \pm 0.8$         | $19.0 \pm 0.3$         |
| $\rho_1$ (e/Å <sup>3</sup> ) | $0.33 \pm 0.01$      | $0.32 \pm 0.01$      | $0.31 \pm 0.01$        | $0.31 \pm 0.01$        |
| $\sigma_1$ (Å)               | $1.5 \pm 0.2$        | $4.7 \pm 1.1$        | $3.3 \pm 0.5$          | $4.2 \pm 0.3$          |
| $\sigma_0$ (Å)               | $4.8 \pm 0.1$        | $3.1 \pm 0.3$        | $3.2 \pm 0.3$          | $3.1 \pm 0.1$          |
| $\chi_v^2$                   | $\sim 5.6$           | $\sim 1.2$           | $\sim 1.5$             | $\sim 1.1$             |

**Table S1** Best-fit parameters and associated uncertainties based on the effective-density model that are used to profile-fit the  $R/R_F$  data.

model is reduced to the multi-box model commonly used in the liquid surface reflectivity data analysis,<sup>4</sup> in which the ED, thickness and roughness can all be determined, given the physically meaningful confinements. In cases where the interfacial roughnesses are large and uncorrelated, and the EDs of the constituent layers are unknown, the effective-density model still provides an avenue to build an ED profile, similar to those free-form ED profiles.<sup>5,6</sup>

In this study, it is found that the effective-density model gives satisfactory  $R/R_F$  profile-fitting (reduced  $\chi^2$ ,  $\chi_v^2 \sim 1 - 5$  for best-profile-fitting) and only  $N = 2$  is required, which corresponds to a two-layer surface structure, reminiscent of a typical monolayer consisting of hydrophilic head groups immersed in the aqueous subphase and hydrophobic, hydrocarbon chains (tail groups). Table S1 lists the parameters (and associated uncertainties) used to profile-fit the  $R/R_F$  data and generate the corresponding ED profiles shown in the main text.

## 2 Surface binding scenario

Under the chosen subphase pH and concentration conditions, the surface monolayer charge (deprotonation) density can be qualitatively estimated for a hypothetically “classic” metal ions  $M$  of valence  $n+$  (denoted as  $M^{n+}$ ).<sup>7,8</sup> Figure S2 (a) shows the estimated charge conditions for AA and DHDP monolayer on a subphase of 1 mM “classical”, free, and trivalent metal ions such as  $La^{3+}$  or divalent metal ions, such as  $Ca^{2+}$ . Figure S2 (b) shows the likely binding scenario for symmetry breaking that accounts for the pre-edge structure in XANES.

## References

- 1 M. Tolan, *X-ray scattering from soft-matter thin films*, (Springer, Germany, 1999).

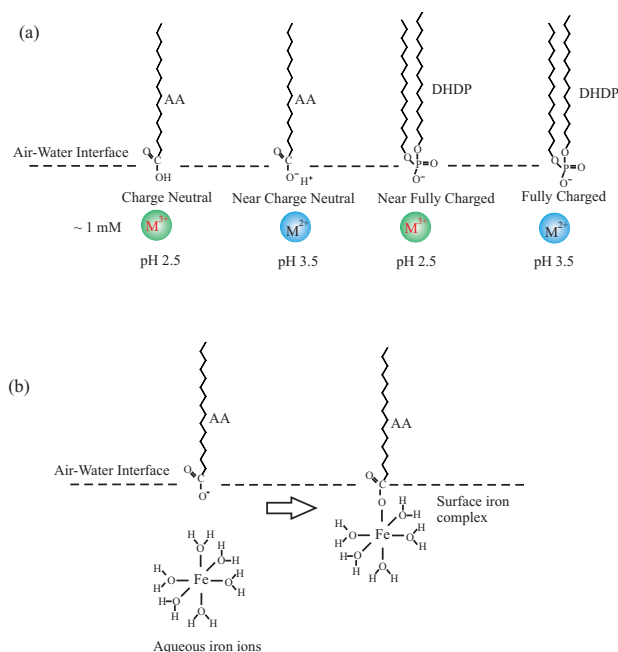

**Fig. S2** (a) Qualitative estimate of surface charge conditions on a subphase trivalent metal ions ( $M^{3+}$ ) or divalent metal ions ( $M^{2+}$ ). The “near charge neutral” and “near fully charged” conditions refer to the cases when the fraction of charged surface is below 50% and above 50%, respectively. (b) A likely scenario for the aqueous iron ions to approach and bind to the surface monolayer. The aqueous iron ions are likely to be enclosed by hydration shell symmetrically. The  $H_2O$  molecules in the hydration shell can be replaced with hydroxyl group(s). This symmetry may be broken upon surface binding.

- 2 L. G. Parratt, Surface Studies of Solids by Total Reflection of X-Rays . *Phys. Rev.* **1954**, *95*, 359.
- 3 J. Als-Nielsen and D. McMorrow, *Elements of Modern X-ray Physics*, **2011**, John Wiley & Sons: London,2011.
- 4 D. Vaknin, X-ray Diffraction and Spectroscopic Techniques for Liquid Surfaces and Interfaces. In *Characterization of Materials*; Ed. Kaufmann, E. N. (John Wiley & Sons: New York, 2012) Vol. 2, 1393-1423.
- 5 M. Weygand, B. Wetzler, D. Pum, U. B. Sleytr, N. Cuvillier, K. Kjaer, P. B. Howes, and Lösche, Bacterial S-Layer Protein Coupling to Lipids: X-Ray Reflectivity and Grazing Incidence Diffraction Studies. *Biophys. J.* **1999**, *76*, 458-468.
- 6 C. F. Laub and T. L. Kuhl, Fitting a Free-form Scattering Length Density Profile to Reflectivity Data Using Temperature-proportional Quenching. *J. Chem. Phys.* **2006**, *125*, 244702.
- 7 W. Wang, R. Y. Park, D. M. Meyer, A. Travesset and D. Vaknin, *Langmuir* 2011, **27**, 11917.
- 8 A. Travesset and D. Vaknin, *Europhys. Lett.* 2006, **74**, 181.
